# Supplementary material
Source: PubMed Central journal article supplement (PMC5885636)

# Supplementary Figure 1

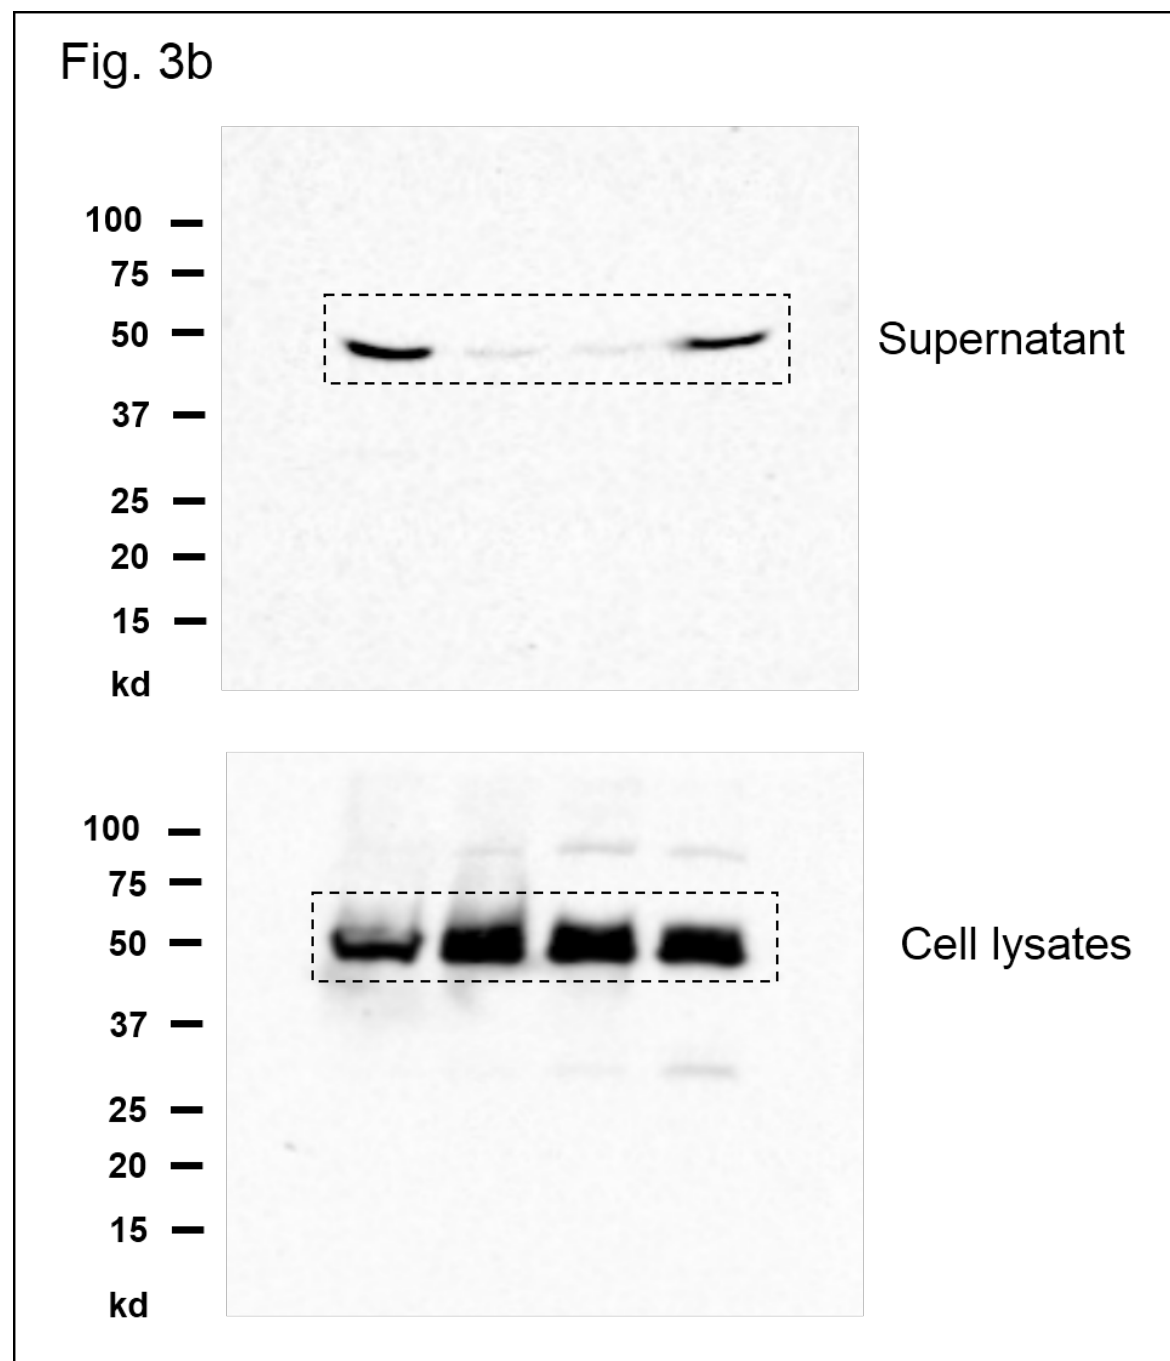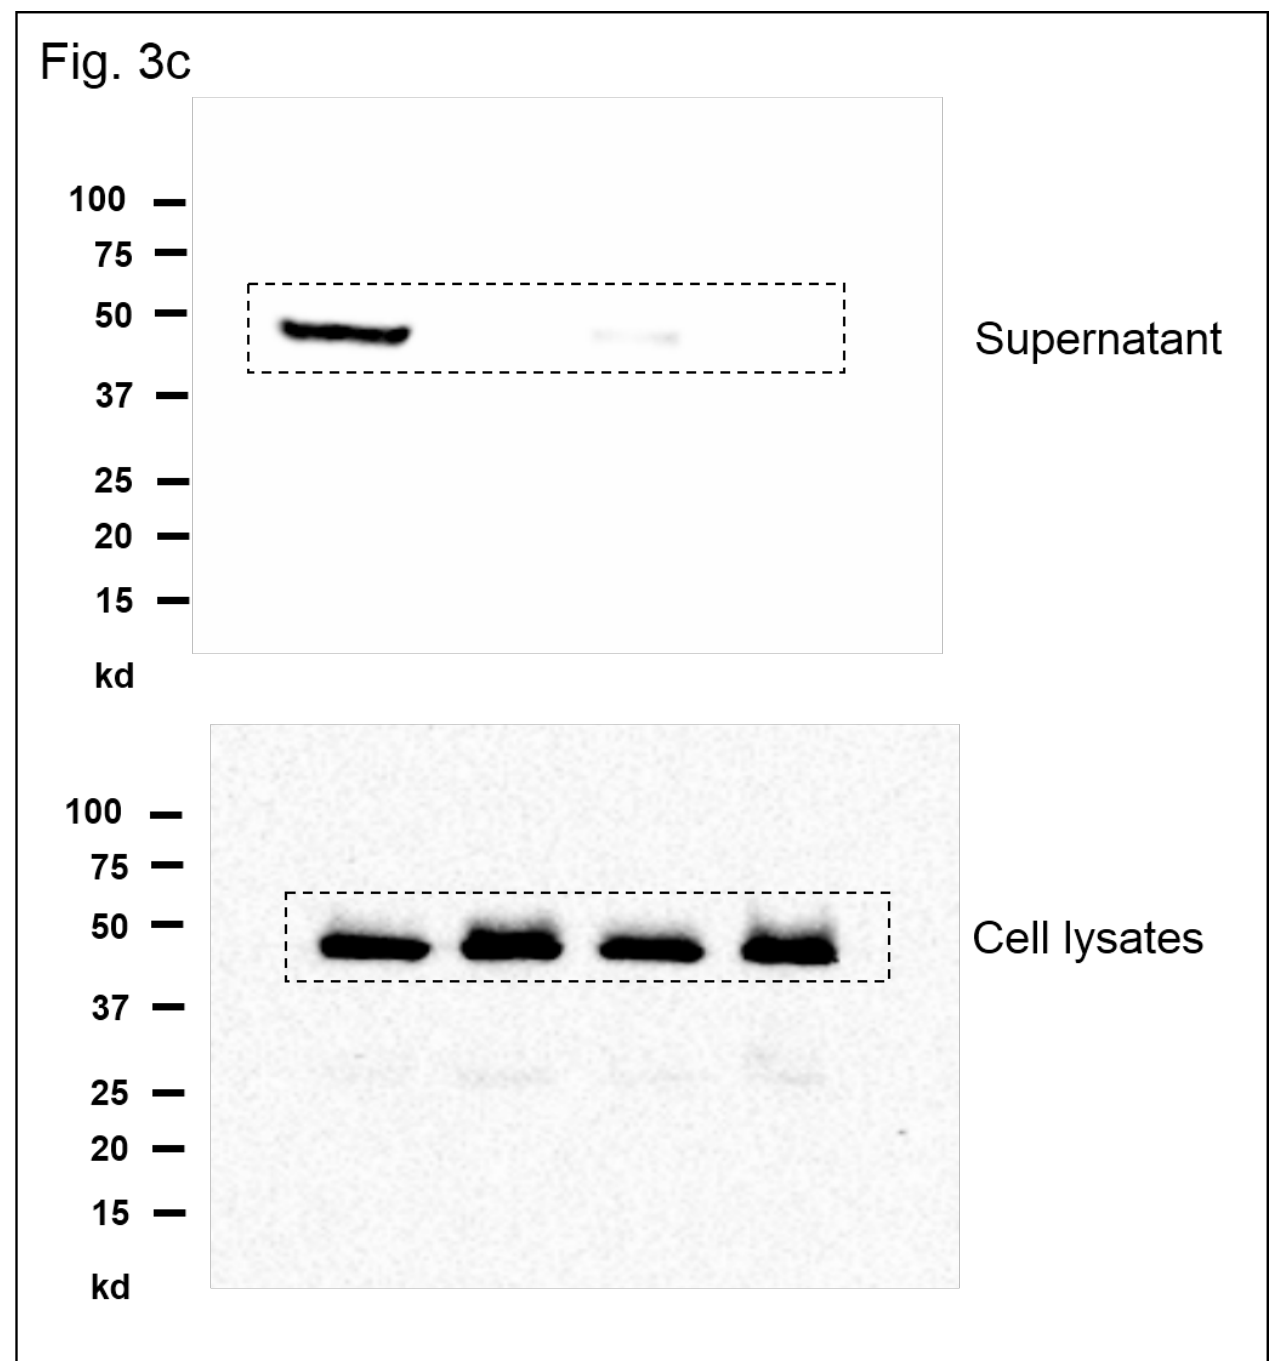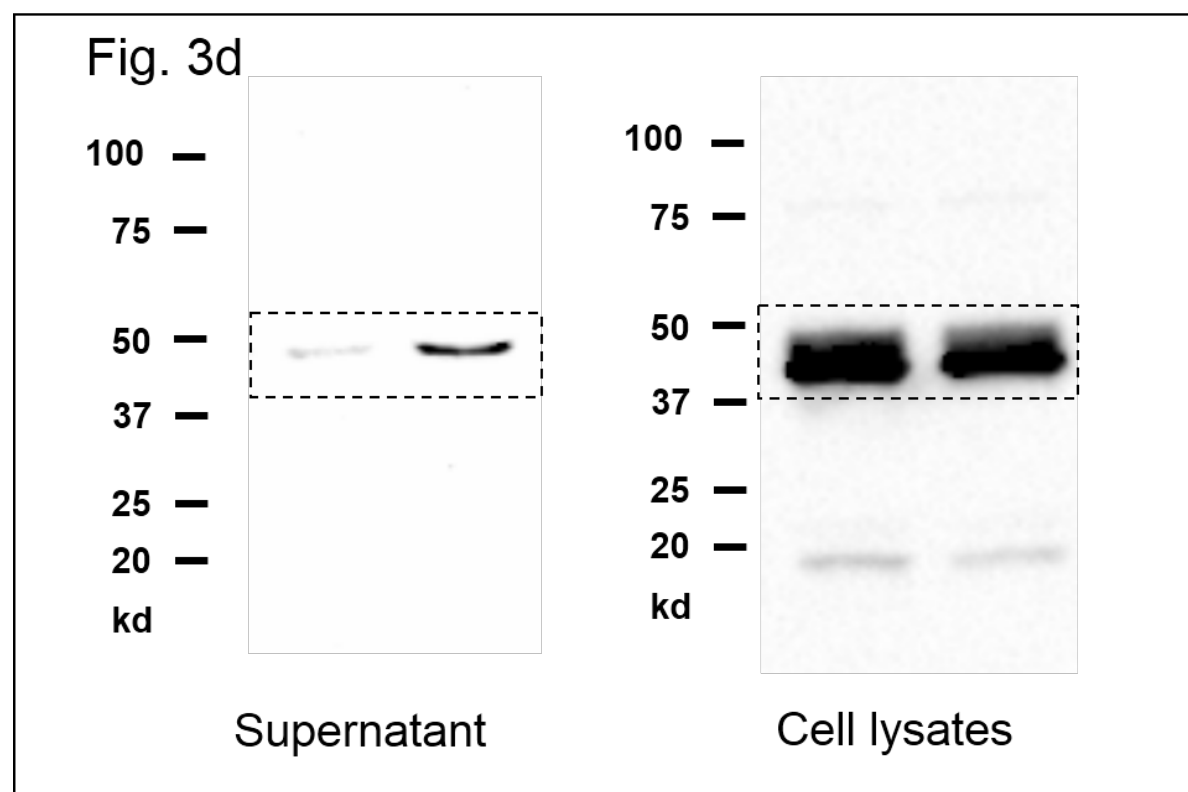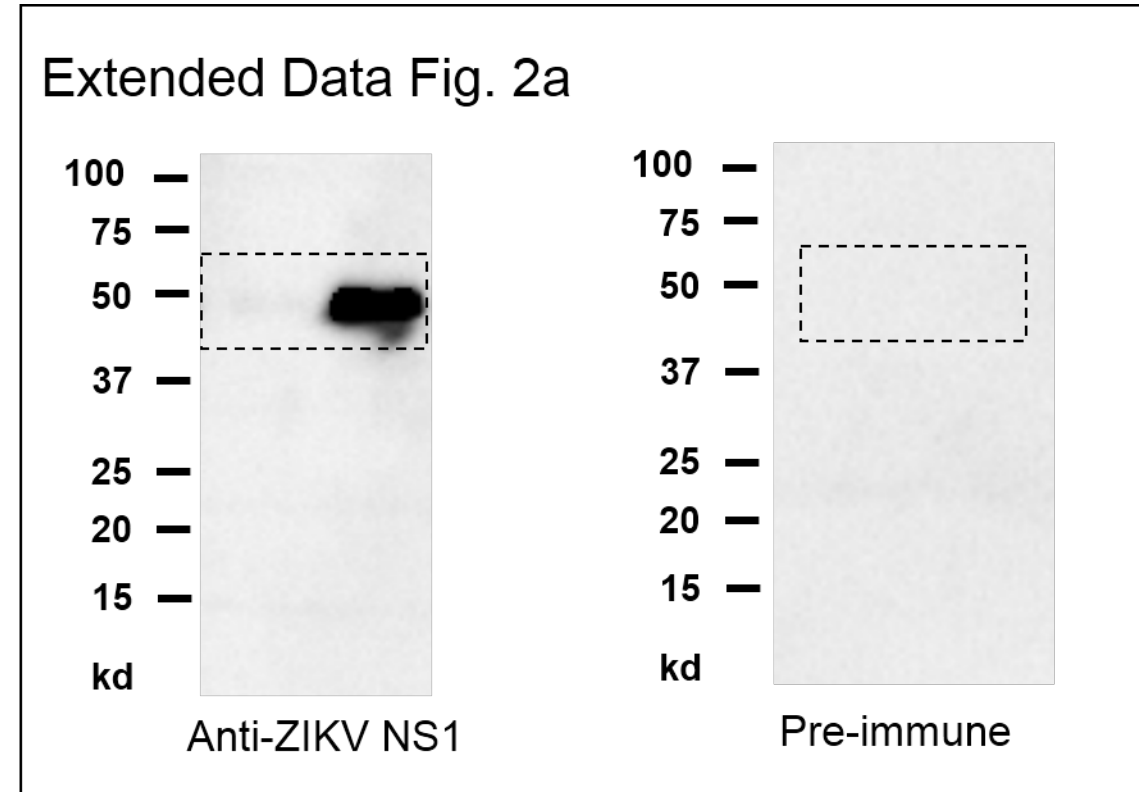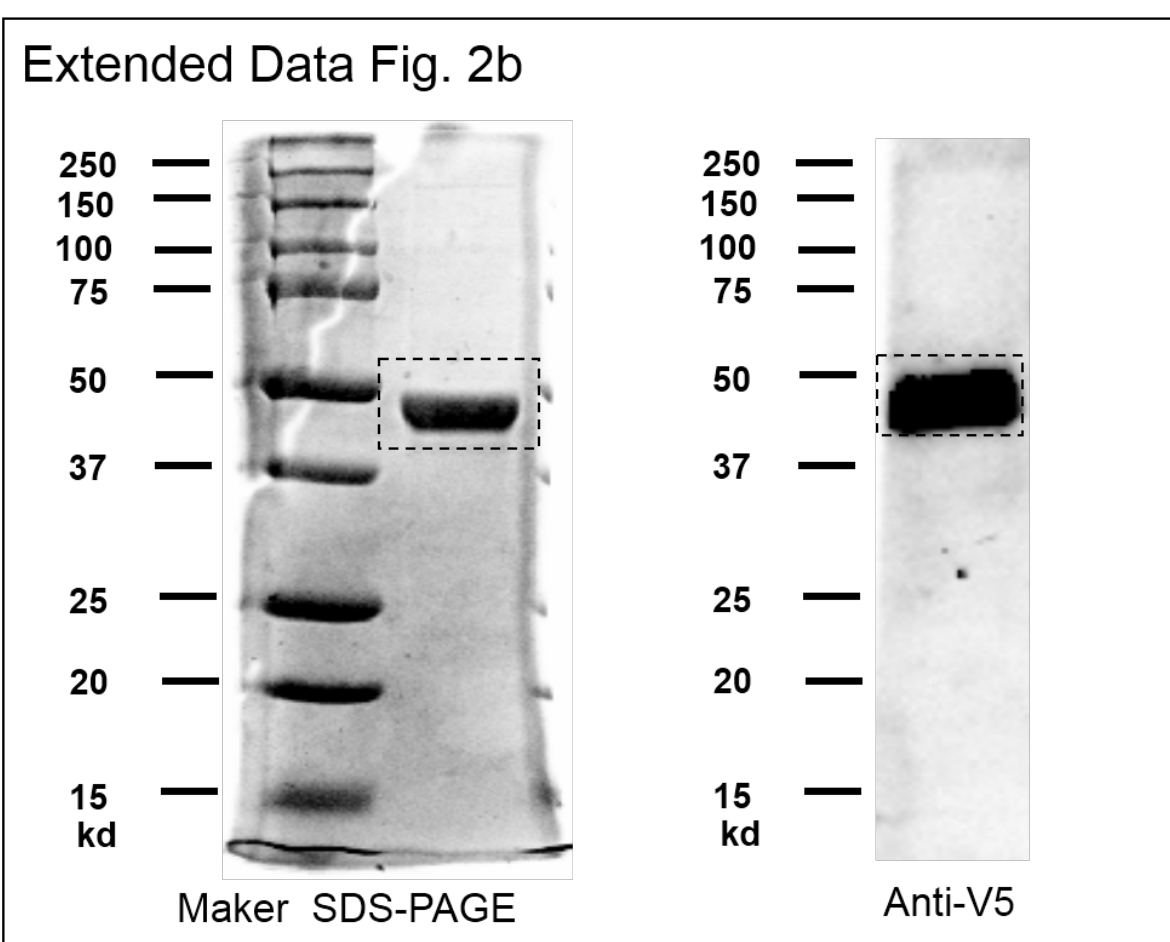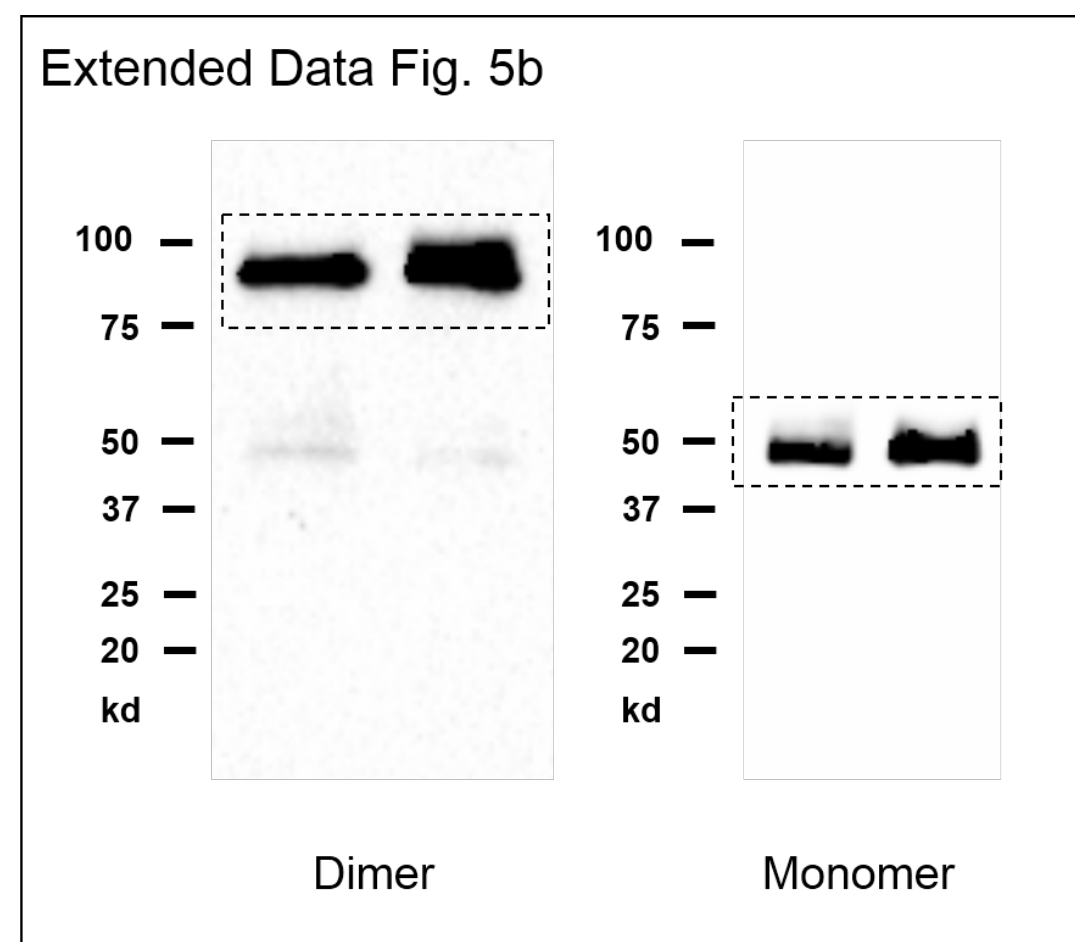

Supplement: NIHMS867392-supplement-Supplementary_Figure_1.pdf [file NIHMS867392-supplement-Supplementary_Figure_1.pdf]
